# Supplementary material for: Low-dose liver CT: image quality and diagnostic accuracy of deep learning image reconstruction algorithm
Source: PubMed Central journal article supplement (PMC10957592; doi:10.1007/s00330-023-10171-8), 2023-09-09
Supplement: 330_2023_10171_MOESM1_ESM.pdf [file 330_2023_10171_MOESM1_ESM.pdf]

Supplemental Material

Supplemental Table 1: Pairwise comparisons of SNR achieved by FBP, ASiR-V, and DLIR reconstruction.

|             | ASiR-V 10% | ASiR-V 20% | ASiR-V 30% | ASiR-V 40% | ASiR-V 50% | ASiR-V 60% | ASiR-V 70% | ASiR-V 80% | ASiR-V 90% | ASiR-V 100% | DLIR_L | DLIR_M | DLIR_H |
|-------------|------------|------------|------------|------------|------------|------------|------------|------------|------------|-------------|--------|--------|--------|
| ASiR-V 10%  |            | < .001     | < .001     | < .001     | < .001     | < .001     | < .001     | < .001     | < .001     | < .001      | < .001 | < .001 | < .001 |
| ASiR-V 20%  | < .001     |            | < .001     | < .001     | < .001     | < .001     | < .001     | < .001     | < .001     | < .001      | < .001 | < .001 | < .001 |
| ASiR-V 30%  | < .001     | < .001     |            | < .017     | < .001     | < .001     | < .001     | < .001     | < .001     | < .001      | < .001 | < .001 | < .001 |
| ASiR-V 40%  | < .001     | < .001     | < .017     |            | < .001     | < .001     | < .001     | < .001     | < .001     | < .001      | < .001 | < .001 | < .001 |
| ASiR-V 50%  | < .001     | < .001     | < .001     | < .001     |            | < .001     | < .001     | < .001     | < .001     | < .001      | < .005 | < .001 | < .001 |
| ASiR-V 60%  | < .001     | < .001     | < .001     | < .001     | < .001     |            | < .001     | < .001     | < .001     | < .001      | 1*     | < .001 | < .001 |
| ASiR-V 70%  | < .001     | < .001     | < .001     | < .001     | < .001     | < .001     |            | < .001     | < .001     | < .001      | 1*     | < .001 | < .001 |
| ASiR-V 80%  | < .001     | < .001     | < .001     | < .001     | < .001     | < .001     | < .001     |            | < .001     | < .001      | < .001 | 1*     | < .001 |
| ASiR-V 90%  | < .001     | < .001     | < .001     | < .001     | < .001     | < .001     | < .001     | < .001     |            | < .001      | < .001 | .010   | < .001 |
| ASiR-V 100% | < .001     | < .001     | < .001     | < .001     | < .001     | < .001     | < .001     | < .001     | < .001     |             | < .001 | < .001 | .051*  |
| DLIR_L      | < .001     | < .001     | < .001     | < .001     | .005       | 1*         | 1*         | < .001     | < .001     | < .001      |        | < .001 | < .001 |
| DLIR_M      | < .001     | < .001     | < .001     | < .001     | < .001     | < .001     | < .001     | 1*         | < .010     | < .001      | < .001 |        | < .001 |
| DLIR_H      | < .001     | < .001     | < .001     | < .001     | < .001     | < .001     | < .001     | < .001     | < .001     | .051*       | < .001 | < .001 |        |

ASiR-V, adaptive statistical iterative reconstruction algorithm; DLIR, deep learning image reconstruction algorithm  
 \* non-statistically significant P-values

**Supplemental Table 2:** Pairwise comparisons of CNR achieved by FBP, ASiR-V, and DLIR reconstruction.

|             | ASiR-V 10% | ASiR-V 20% | ASiR-V 30% | ASiR-V 40% | ASiR-V 50% | ASiR-V 60% | ASiR-V 70% | ASiR-V 80% | ASiR-V 90% | ASiR-V 100% | DLIR_L | DLIR_M | DLIR_H |
|-------------|------------|------------|------------|------------|------------|------------|------------|------------|------------|-------------|--------|--------|--------|
| ASiR-V 10%  |            | .654*      | < .001     | < .001     | < .001     | < .001     | < .001     | < .001     | < .001     | < .001      | < .001 | < .001 | < .001 |
| ASiR-V 20%  | .654*      |            | < .001     | < .001     | < .001     | < .001     | < .001     | < .001     | < .001     | < .001      | < .001 | < .001 | < .001 |
| ASiR-V 30%  | < .001     | < .001     |            | .078*      | < .001     | < .001     | < .001     | < .001     | < .001     | < .001      | < .001 | < .001 | < .001 |
| ASiR-V 40%  | < .001     | < .001     | .078*      |            | < .001     | < .001     | < .001     | < .001     | < .001     | < .001      | < .001 | < .001 | < .001 |
| ASiR-V 50%  | < .001     | < .001     | < .001     | < .001     |            | < .001     | < .001     | < .001     | < .001     | < .001      | .003   | < .001 | < .001 |
| ASiR-V 60%  | < .001     | < .001     | < .001     | < .001     | < .001     |            | < .001     | < .001     | < .001     | < .001      | 1*     | < .001 | < .001 |
| ASiR-V 70%  | < .001     | < .001     | < .001     | < .001     | < .001     | < .001     |            | < .001     | < .001     | < .001      | 1*     | .001   | < .001 |
| ASiR-V 80%  | < .001     | < .001     | < .001     | < .001     | < .001     | < .001     | < .001     |            | < .001     | < .001      | < .001 | 1*     | < .001 |
| ASiR-V 90%  | < .001     | < .001     | < .001     | < .001     | < .001     | < .001     | < .001     | < .001     |            | < .001      | < .001 | .015   | < .001 |
| ASiR-V 100% | < .001     | < .001     | < .001     | < .001     | < .001     | < .001     | < .001     | < .001     | < .001     |             | < .001 | < .001 | 1*     |
| DLIR_L      | < .001     | < .001     | < .001     | < .001     | .003       | 1*         | 1*         | < .001     | < .001     | < .001      |        | < .001 | < .001 |
| DLIR_M      | < .001     | < .001     | < .001     | < .001     | < .001     | < .001     | .001       | 1*         | .015       | < .001      | < .001 |        | < .001 |
| DLIR_H      | < .001     | < .001     | < .001     | < .001     | < .001     | < .001     | < .001     | < .001     | < .001     | 1*          | < .001 | < .001 |        |

ASiR-V, adaptive statistical iterative reconstruction algorithm; DLIR, deep learning image reconstruction algorithm  
 \* non-statistically significant *P*-values
